# Supplementary material
Source: HighWire-hosted journal article supplement (https://www.jneurosci.org/content/40/49/9401)
Supplement: inline-supplementary-material-3 [file inline-supplementary-material-3.docx]

**Figure 2-3. Expression of HC-specific transcription factors is unchanged in *Jag1* mutant cochlear epithelia.** HC-specific transcription factor expression in*Sox2-CreERT2/+::Jag1fx/fx* (*Jag1* mut) samples compared to *Jag1fx/fx* (Control, Ctrl) samples. Tamoxifen and progesterone were injected at E14.5 and cochlear epithelia were collected and analyzed at P0. Genes are listed in alphabetical order.

| Gene Symbol | Accession ID | P-Value | Mean log2 Ctrl | Mean log2 Jag1 mut | Fold Change |
| --- | --- | --- | --- | --- | --- |
| Atoh1 | NM_007500 | 0.5907 | 9.92 | 9.79 | -1.09 |
| Bcl11b | NM_001079883 | 0.5710 | 6.53 | 6.64 | 1.08 |
| Casz1 | NM_001159344 | 0.4826 | 7.35 | 7.49 | 1.10 |
| Gfi1 | NM_001267621 | 0.8149 | 6.84 | 6.82 | -1.01 |
| Hes6 | NM_019479 | 0.3038 | 8.05 | 7.99 | -1.04 |
| Insm1 | NM_016889 | 0.8404 | 6.67 | 6.64 | -1.02 |
| Nhlh1 | NM_010916 | 0.8482 | 7.25 | 7.31 | 1.04 |
| Pou4f3 | NM_138945 | 0.4557 | 7.89 | 7.95 | -1.09 |
